# Supplementary material for: Industrial and culinary treatments applied to Piquillo pepper (Capsicum annuum cv. Piquillo) impact positively on (poly)phenols’ bioaccessibility and gut microbiota catabolism
Source: Royal Society of Chemistry journal article supplement (doi:10.1039/d3fo04762h), 2024-01-01
Supplement: d3fo04762h1.pdf [file d3fo04762h1.pdf]

**TITLE: “ Industrial and culinary treatments applied to Piquillo pepper (*Capsicum annuum* cv. *Piquillo*) impact positively on (poly)phenols bioaccessibility and gut microbiota catabolism”**

**AUTHORS: Cristina Del Burgo-Gutiérrez<sup>1,2</sup>, Iziar A. Ludwig<sup>1,2,3\*</sup>, María-Paz De Peña<sup>1,2,3</sup> and  
Concepción Cid<sup>1,2,3</sup>**

<sup>1</sup> University of Navarra, Faculty of Pharmacy & Nutrition, Department of Nutrition, Food  
Science & Physiology, 31008 Pamplona, Spain

<sup>2</sup> University of Navarra, Center for Nutrition Research, c/Irunlarrea 1, 31008 Pamplona, Spain

<sup>3</sup> IdiSNA, Navarra Institute for Health Research, 31008 Pamplona, Spain

\* Iziar A. Ludwig: [iludwig@unav.es](mailto:iludwig@unav.es); +34 948425600 (Ext. 806652)

**SUPPLEMENTARY MATERIALS**

**Table S1.** Concentration of electrolyte stock solutions and simulated salivary fluid (SSF) simulated gastric fluid (SGF) and simulated intestinal fluid (SIF) for *in vitro* gastrointestinal digestion.

| Compound                                             | MW     | Stock solution |         | SSF                  | SGF                    | SIF      |
|------------------------------------------------------|--------|----------------|---------|----------------------|------------------------|----------|
|                                                      |        | mol/L          | g/50 ml | (500 mL)             | (500 mL)               | (500 mL) |
|                                                      |        |                |         | mL of stock solution |                        |          |
| <b>KCl</b>                                           | 74.55  | 0.50           | 1.85    | 18.87                | 8.62                   | 8.50     |
| <b>KH<sub>2</sub>PO<sub>4</sub></b>                  | 136.09 | 0.50           | 3.40    | 4.62                 | 1.12                   | 1.00     |
| <b>NaHCO<sub>3</sub></b>                             | 84.01  | 1.00           | 4.20    | 8.50                 | 15.62                  | 53.12    |
| <b>NaCl</b>                                          | 58.40  | 2.00           | 5.85    | -                    | 14.75                  | 12.00    |
| <b>MgCl<sub>2</sub> (H<sub>2</sub>O)<sub>6</sub></b> | 203.21 | 0.15           | 1.52    | 0.62                 | 0.50                   | 1.37     |
| <b>(NH<sub>4</sub>)<sub>2</sub>CO<sub>3</sub></b>    | 96.09  | 0.50           | 2.40    | 0.07                 | 0.62                   | -        |
| <b>HCl</b>                                           | 36.46  | 6.00           | -       | 0.11                 | 1.62                   | 0.87     |
| <b>CaCl<sub>2</sub></b>                              | 147.02 | 0.30           | 2.20    | 0.03                 | 6.25 x10 <sup>-3</sup> | 0.05     |

\* MW= Molecular weight

**Table S2.** Mass spectrometric identification parameters of (poly)phenol compounds identified in Piquillo pepper of Lodosa after *in vitro* gastrointestinal digestion and colonic fermentation determined by HPLC-ESI-MS/MS and their standardized nomenclature proposed by Kay et al., (33).

| Recommended name                              | Other common names                  | Abbreviation                 | Rt    | [M-H] <sup>-</sup><br>(m/z) | MS <sup>2</sup> quantifier | MS <sup>2</sup> qualifier | CE (eV) |
|-----------------------------------------------|-------------------------------------|------------------------------|-------|-----------------------------|----------------------------|---------------------------|---------|
| <b>Benzenediols and triols</b>                |                                     |                              |       |                             |                            |                           |         |
| Benzene -1,2-diol                             | 1,2-Dihydroxybenzene, Catechol      | Benz-1,2-diol                | 3.15  | 109                         | 108                        | 91                        | -25     |
| Benzene -1,2,3-triol                          | 1,2,3-Trihydroxybenzene, Pyrogallol | Benz-1,2,3-triol             | 1.30  | 125                         | 79                         | 81                        | -25     |
| <b>Benzoic acids</b>                          |                                     |                              |       |                             |                            |                           |         |
| 3-Hydroxybenzoic acid                         | -                                   | 3-OH-BA                      | 6.24  | 137                         | 93                         | 109                       | -20     |
| 4-Hydroxybenzoic acid                         | -                                   | 4-OH-BA                      | 4.12  | 137                         | 93                         |                           | -15     |
| 2,5-Dihydroxybenzoic acid                     | -                                   | 2,5-diOH-BA                  | 4.40  | 153                         | 108                        | 109                       | -30     |
| 3,4-Dihydroxybenzoic acid                     | Protocatechuic acid                 | 3,4-diOH-BA                  | 2.20  | 153                         | 109                        | 91                        | -35     |
| 3-Methoxybenzoic acid 4-O-glucoside           | Vanillic acid glucoside             | 3-MetOH-BA-4-O-GlucSD        | 3.10  | 329                         | 167                        | 209                       | -25     |
| <b>Cinnamic acids</b>                         |                                     |                              |       |                             |                            |                           |         |
| 4'-Hydroxycinnamic acid                       | p-coumaric acid                     | 4'-OH-CA                     | 8.70  | 163                         | 119                        | 93                        | -30     |
| Cinnamic-4'-O-glucoside                       | Coumaric acid glucoside             | CA-4'-O-GlucSD               | 5.80  | 325                         | 163                        | 119                       | -25     |
| 3',4'-Dihydroxycinnamic acid                  | Caffeic acid                        | 3',4'-diOH-CA                | 6.31  | 179                         | 135                        | 134                       | -30     |
| 4'-Hydroxycinnamic-3-O-glucoside              | Caffeic acid glucoside              | 4'-OH-CA-3'-O-GlucSD         | 6.20  | 341                         | 179                        | 135                       | -20     |
| 4'-Hydroxy-3'-methoxycinnamic acid            | Ferulic acid                        | 4'-OH-3'-MetOH-CA            | 9.45  | 193                         | 134                        | 178                       | -20     |
| 3'-Hydroxy-4'-methoxycinnamic acid            | Isoferulic acid                     | 3'-OH-4'-MetOH-CA            | 9.50  | 193                         | 178                        | 134                       | -15     |
| 3'-Methoxycinnamic-4'-O-glucoside             | Ferulic acid glucoside              | 3'-MetOH-CA-4'-O-GlucSD      | 7.10  | 355                         | 175                        | 193                       | -20     |
| 4'-Hydroxy-3',5'-dimethoxycinnamic acid       | Sinapic acid                        | 4'-OH-3',5'-diMetOH-CA       | 9.60  | 223                         | 193                        | 121                       | -30     |
| 3',5'-Dimethoxycinnamic-4'-O-glucoside        | Sinapic acid glucoside              | 3',5'-diMetOH-CA-4'-O-GlucSD | 7.50  | 385                         | 223                        | 164                       | -25     |
| <b>Phenylpropanoic acids</b>                  |                                     |                              |       |                             |                            |                           |         |
| 3-Phenylpropanoic acid                        | 3-Phenylpropionic acid              | 3-PrA                        | 14.55 | 149                         | 105                        |                           | -15     |
| 3-(3'-Hydroxyphenyl)propanoic acid            |                                     | 3-(3'-OH-ph)PrA              | 9.20  | 165                         | 121                        | 119                       | -15     |
| 3-(3',4'-Dihydroxyphenyl)propanoic acid       | Dihydrocaffeic acid                 | 3-(3',4'-diOH-ph)-PrA        | 5.60  | 181                         | 59                         | 137                       | -25     |
| 3-(4'-Hydroxy-3'-methoxyphenyl)propanoic acid | Dihydroferulic acid                 | 3-(4'-OH-3'-MetOH-ph)PrA     | 9.00  | 195                         | 136                        | 121                       | -30     |
| <b>Phenylacetic acids</b>                     |                                     |                              |       |                             |                            |                           |         |
| Phenylacetic acid                             | Phenylacetic acid                   | PhA                          | 10.20 | 135                         | 91                         | 83                        | -15     |
| 3'-Hydroxyphenylacetic acid                   | -                                   | 3'-OH-PhA                    | 6.70  | 151                         | 107                        | 93                        | -10     |
| 4'-Hydroxyphenylacetic acid                   | -                                   | 4'-OH-PhA                    | 5.42  | 151                         | 107                        | 65                        | -15     |
| 4'-Hydroxy-3'-methoxyphenylacetic acid        | Homovanillic acid                   | 4'-OH-3'-MetOH-phAc          | 7.30  | 181                         | 137                        | 163                       | -25     |
| <b>Others</b>                                 |                                     |                              |       |                             |                            |                           |         |
| 2-(3'-Hydroxyphenyl)ethanol                   | Hydroxytyrosol                      | 2'-OH-4'MetOH-Ac-phON        | 2.10  | 153                         | 123                        | 108                       | -30     |
| 4-Hydroxy-1,2-benzopyrone                     | 4-Hydroxycoumarin                   | 4-OH-1,2-BenzPyON            | 6.50  | 161                         | 117                        | 133                       | -30     |
| 2'-Hydroxy-4'-methoxyacetophenone             | Paeonol                             | 2'-OH-4'MetOH-Ac-phON        | 8.70  | 165                         | 150                        |                           | -25     |
| <b>Acyl-quinic acids</b>                      |                                     |                              |       |                             |                            |                           |         |
| 5-Caffeoylquinic acid                         | Chlorogenic acid                    | 5-CQA                        | 5.85  | 353                         | 191                        | 179                       | -20     |
| 4-Caffeoylquinic acid                         | Cryptochlorogenic acid              | 4-CQA                        | 6.73  | 353                         | 173                        | 179                       | -30     |

**Table 2 (Continued)**

| Recommended name                                                           | Other common names | Abbreviation                                              | Rt    | [M-H] <sup>-</sup><br>(m/z) | MS <sup>2</sup> quantifier | MS <sup>2</sup> qualifier | CE (eV) |
|----------------------------------------------------------------------------|--------------------|-----------------------------------------------------------|-------|-----------------------------|----------------------------|---------------------------|---------|
| <b>FLAVONOIDS</b>                                                          |                    |                                                           |       |                             |                            |                           |         |
| <b>Flavonols</b>                                                           |                    |                                                           |       |                             |                            |                           |         |
| Quercetin                                                                  | Quercetin          | Quercetin                                                 | 15.92 | 301                         | 151                        | 179                       | -30     |
| Quercetin-3- <i>O</i> -rutinoside                                          | Rutin              | Querc-3- <i>O</i> -Rut                                    | 9.96  | 609                         | 301                        | 179                       | -50     |
| Quercetin-3- <i>O</i> -glucoside                                           | Isoquercitrin      | Querc-3- <i>O</i> -GlucSD                                 | 10.25 | 463                         | 300                        | 301                       | -35     |
| Quercetin-3- <i>O</i> -rhamnoside                                          | Quercitrin         | Querc-3- <i>O</i> -Rha                                    | 12.28 | 447                         | 301                        | 283                       | -40     |
| Quercetin-acetyl-glucoside                                                 | -                  | Querc-Ace-GlucSD                                          | 11.50 | 505                         | 300                        | 271                       | -30     |
| Quercetin-3- <i>O</i> -glucoside-7- <i>O</i> -rhamnoside                   | -                  | Querc-3- <i>O</i> -GlucSD-7- <i>O</i> -Rha                | 8.30  | 609                         | 301                        | 463                       | -40     |
| Quercetin-3- <i>O</i> -sambubioside-7- <i>O</i> -rhamnoside                | -                  | Querc-3- <i>O</i> -Samb-7- <i>O</i> -Rha                  | 8.4   | 741                         | 299                        | 301                       | -65     |
| Isorhamnetin                                                               | -                  | Isorhamnetin                                              | 18.30 | 315                         | 300                        | 151                       | -30     |
| Isorhamnetin-3- <i>O</i> -glucoside                                        | -                  | IsorhTN-3- <i>O</i> -GlucSD                               | 12.49 | 477                         | 314                        | 271                       | -25     |
| Kaempferol                                                                 | -                  | Kaempferol                                                | 18.18 | 285                         | 93                         | 65                        | -50     |
| Kaempferol-7- <i>O</i> -glucoside                                          | -                  | Kmpf-7- <i>O</i> -GlucSD                                  | 12.72 | 447                         | 285                        | 284                       | -30     |
| Kaempferol-malonyl-glucoside                                               | -                  | Kmpf-MaO-GlucSD                                           | 13.22 | 533                         | 489                        | 285                       | -30     |
| <b>Flavones</b>                                                            |                    |                                                           |       |                             |                            |                           |         |
| Luteolin                                                                   | -                  | Luteolin                                                  | 15.83 | 285                         | 133                        | 151                       | -50     |
| Luteolin-7- <i>O</i> -glucoside                                            | -                  | Lut-7- <i>O</i> -GlucSD                                   | 10.32 | 447                         | 285                        | 327                       | -30     |
| Luteolin-8- <i>C</i> -glucoside                                            | Orientin           | Lut-8- <i>C</i> -GlucSD                                   | 9.38  | 447                         | 327                        | 297                       | -35     |
| Luteolin-6- <i>C</i> -glucoside                                            | Isoorientin        | Lut-6- <i>C</i> -GlucSD                                   | 9.18  | 447                         | 327                        | 257                       | -25     |
| Luteolin-6- <i>C</i> -hexoside-8- <i>C</i> -pentoside                      | -                  | Lut-6- <i>C</i> -Hex-8- <i>C</i> -Pent                    | 8.50  | 579                         | 459                        | 489                       | -30     |
| Luteolin-6- <i>C</i> -pentoside-8- <i>C</i> -hexoside                      | -                  | Lut-6- <i>C</i> -Pent-8- <i>C</i> -Hex                    | 8.90  | 579                         | 489                        | 459                       | -30     |
| Luteolin-6,8- <i>C</i> -diglucoside                                        | Lucenin-2          | Lut-6,8- <i>C</i> -diGlucSD                               | 8.10  | 609                         | 369                        | 399                       | -55     |
| Luteolin-7- <i>O</i> -(2- <i>O</i> -apiosyl)glucoside                      | -                  | Lut-7- <i>O</i> -(2- <i>O</i> -Ap)GlucSD                  | 10.26 | 579                         | 285                        | 447                       | -40     |
| Luteolin-7- <i>O</i> -(2- <i>O</i> -apiosylacetyl)glucoside                | -                  | Lut-7- <i>O</i> -(2- <i>O</i> -Ap-Ace)GlucSD              | 13.01 | 621                         | 285                        | 489                       | -55     |
| Luteolin-7- <i>O</i> -(2- <i>O</i> -apiosyl-6- <i>O</i> -malonyl)glucoside | -                  | Lut-7- <i>O</i> -(2- <i>O</i> -Ap-6- <i>O</i> -MaO)GlucSD | 13.20 | 665                         | 621                        | 285                       | -40     |
| Chrysoeriol 6- <i>C</i> -glucoside                                         | Isoscoparin        | ChryOL 6- <i>C</i> -GlucSD                                | 10.44 | 461                         | 341                        | 371                       | -30     |
| Apigenin-8- <i>C</i> -glucoside                                            | Vitexin            | Apig-8- <i>C</i> -GlucSD                                  | 9.94  | 431                         | 311                        | 283                       | -30     |
| Apigenin-6,8- <i>C</i> -diglucoside                                        | Vicenin-2          | Apig-6,8- <i>C</i> -diGlucSD                              | 8.56  | 593                         | 353                        | 383                       | -45     |
| Apigenin-pentoside-hexoside                                                | -                  | Apig-Pent-Hex                                             | 8.98  | 563                         | 383                        | 473                       | -40     |
| Apigenin-7- <i>O</i> -(2- <i>O</i> -apiosyl)glucoside                      | Apiin              | Apig-7- <i>O</i> -(2- <i>O</i> -Ap)GlucSD                 | 16.20 | 563                         | 131                        | 151                       | -40     |
| <b>Flavanones</b>                                                          |                    |                                                           |       |                             |                            |                           |         |
| Naringenin                                                                 | -                  | Naringenin                                                | 17.90 | 271                         | 151                        | 177                       | -40     |
| Naringenin-7- <i>O</i> -Glucoside                                          | -                  | NarGE-7- <i>O</i> -GlucSD                                 | 12.51 | 433                         | 271                        | 313                       | -20     |

Rt, retention time; m/z, mass-to-charge ratio; [M-H]<sup>-</sup>, Negatively charged molecular ion; MS<sup>2</sup>, MS/MS transitions (qualifier and quantifier); CE, Collision energy.

**Table S3.** Content of individual (poly)phenolic compounds and derivatives from *in vitro* gastrointestinal digestion of raw and thermally treated Piquillo pepper. Results are expressed as  $\mu\text{mol}$  of (poly)phenol per g of pepper (dry matter) (mean  $\pm$  standard deviation,  $n=3$ )

| Compound <sup>a</sup>                     | Raw               | Grilled           | Canned            | Microwaved        | Fried             |
|-------------------------------------------|-------------------|-------------------|-------------------|-------------------|-------------------|
| <b>NON FLAVONOIDS</b>                     |                   |                   |                   |                   |                   |
| <b>Benzenediols and triols</b>            |                   |                   |                   |                   |                   |
| Benz -1,2-diol                            | nd                | 0.177 $\pm$ 0.007 | 0.131 $\pm$ 0.003 | 0.139 $\pm$ 0.001 | 0.109 $\pm$ 0.003 |
| Benz -1,2,3-triol                         | nd                | 0.014 $\pm$ 0.001 | 0.013 $\pm$ 0.000 | 0.011 $\pm$ 0.001 | 0.010 $\pm$ 0.001 |
| <b>Benzoic acid</b>                       |                   |                   |                   |                   |                   |
| 3-OH-BA                                   | 0.004 $\pm$ 0.000 | 0.028 $\pm$ 0.001 | 0.016 $\pm$ 0.001 | 0.016 $\pm$ 0.001 | 0.010 $\pm$ 0.000 |
| 4-OH-BA                                   | 0.023 $\pm$ 0.002 | 0.030 $\pm$ 0.001 | 0.038 $\pm$ 0.001 | 0.039 $\pm$ 0.001 | 0.024 $\pm$ 0.001 |
| 2,5-diOH-BA                               | 0.005 $\pm$ 0.000 | 0.006 $\pm$ 0.000 | 0.006 $\pm$ 0.000 | 0.005 $\pm$ 0.000 | 0.003 $\pm$ 0.000 |
| 3,4-diOH-BA                               | 0.003 $\pm$ 0.000 | 0.016 $\pm$ 0.001 | 0.027 $\pm$ 0.002 | 0.028 $\pm$ 0.000 | 0.023 $\pm$ 0.001 |
| 3-MetOH-BA-4-O-GlucSD                     | 0.305 $\pm$ 0.008 | 0.424 $\pm$ 0.012 | 0.233 $\pm$ 0.005 | 0.244 $\pm$ 0.012 | 0.206 $\pm$ 0.012 |
| <b>Cinnamic acids</b>                     |                   |                   |                   |                   |                   |
| 4'-OH-CA                                  | 0.015 $\pm$ 0.000 | 0.010 $\pm$ 0.000 | 0.006 $\pm$ 0.000 | 0.007 $\pm$ 0.000 | 0.006 $\pm$ 0.000 |
| CA-4'-O-GlucSD <sup>b</sup>               | 1.025 $\pm$ 0.046 | 0.395 $\pm$ 0.003 | 0.262 $\pm$ 0.012 | 0.282 $\pm$ 0.003 | 0.257 $\pm$ 0.024 |
| 3',4'-diOH-CA                             | 0.020 $\pm$ 0.000 | 0.012 $\pm$ 0.001 | 0.009 $\pm$ 0.001 | 0.009 $\pm$ 0.000 | 0.009 $\pm$ 0.000 |
| 4'-OH-CA-3'-O-GlucSD                      | 0.053 $\pm$ 0.003 | 0.023 $\pm$ 0.002 | 0.020 $\pm$ 0.001 | 0.022 $\pm$ 0.000 | 0.016 $\pm$ 0.001 |
| 4'-OH-3'-MetOH-CA                         | 0.126 $\pm$ 0.003 | 0.055 $\pm$ 0.001 | 0.041 $\pm$ 0.001 | 0.045 $\pm$ 0.000 | 0.044 $\pm$ 0.001 |
| 3'-OH-4'-MetOH-CA                         | 0.017 $\pm$ 0.000 | 0.005 $\pm$ 0.000 | 0.006 $\pm$ 0.000 | 0.007 $\pm$ 0.001 | 0.006 $\pm$ 0.001 |
| 3'-MetOH-CA-4'-O-GlucSD <sup>b</sup>      | 0.074 $\pm$ 0.002 | 0.116 $\pm$ 0.001 | 0.076 $\pm$ 0.007 | 0.068 $\pm$ 0.004 | 0.036 $\pm$ 0.003 |
| 4'-OH-3',5'-diMetOH-CA                    | 0.031 $\pm$ 0.002 | 0.009 $\pm$ 0.000 | 0.011 $\pm$ 0.000 | 0.011 $\pm$ 0.000 | 0.009 $\pm$ 0.000 |
| 3',5'-diMetOH-CA-4'-O-GlucSD <sup>b</sup> | 0.026 $\pm$ 0.002 | 0.016 $\pm$ 0.000 | 0.012 $\pm$ 0.000 | 0.013 $\pm$ 0.000 | 0.012 $\pm$ 0.000 |
| <b>Phenylpropanoic acids</b>              |                   |                   |                   |                   |                   |
| 3-PrA <sup>c</sup>                        | 0.693 $\pm$ 0.014 | 0.729 $\pm$ 0.010 | 0.820 $\pm$ 0.024 | 0.871 $\pm$ 0.010 | 0.649 $\pm$ 0.009 |
| 3-(3-OH-ph)PrA <sup>c</sup>               | 0.007 $\pm$ 0.000 | 0.007 $\pm$ 0.001 | 0.007 $\pm$ 0.000 | 0.009 $\pm$ 0.001 | 0.006 $\pm$ 0.000 |
| 3-(3',4'-diOH-ph)PrA                      | 0.017 $\pm$ 0.001 | 0.017 $\pm$ 0.001 | 0.017 $\pm$ 0.001 | 0.017 $\pm$ 0.000 | 0.013 $\pm$ 0.000 |
| 3-(4'-OH-3'-MetOH-ph)PrA <sup>c</sup>     | 0.101 $\pm$ 0.003 | 0.082 $\pm$ 0.004 | 0.098 $\pm$ 0.001 | 0.098 $\pm$ 0.004 | 0.069 $\pm$ 0.002 |
| <b>Phenylacetic acids</b>                 |                   |                   |                   |                   |                   |
| PhA <sup>c</sup>                          | 1.078 $\pm$ 0.049 | 1.053 $\pm$ 0.065 | 1.187 $\pm$ 0.029 | 1.298 $\pm$ 0.025 | 0.757 $\pm$ 0.007 |
| 4'-OH-3'-MetOH-PhA <sup>b</sup>           | nd                | 1.419 $\pm$ 0.021 | 1.010 $\pm$ 0.027 | 1.192 $\pm$ 0.085 | 1.103 $\pm$ 0.016 |
| <b>Others</b>                             |                   |                   |                   |                   |                   |
| 2-(3'-OH-Ph)etOH <sup>c</sup>             | Tr                | Tr                | Tr                | Tr                | 0.006 $\pm$ 0.000 |
| 4-OH-1,2-BenzPyON <sup>b</sup>            | nd                | Tr                | Tr                | Tr                | Tr                |
| 2'-OH-4'methO-A-phON <sup>b</sup>         | 0.006 $\pm$ 0.000 | Tr                | Tr                | Tr                | Tr                |
| <b>Acyl-quinic acids</b>                  |                   |                   |                   |                   |                   |
| 5-CQA                                     | 0.006 $\pm$ 0.001 | Tr                | Tr                | Tr                | Tr                |
| 4-CQA                                     | Tr                | Tr                | Tr                | Tr                | Tr                |
| <b>FLAVONOIDS</b>                         |                   |                   |                   |                   |                   |
| <b>Flavonols</b>                          |                   |                   |                   |                   |                   |
| Querc                                     | 0.010 $\pm$ 0.000 | 0.013 $\pm$ 0.001 | 0.011 $\pm$ 0.000 | 0.011 $\pm$ 0.000 | 0.009 $\pm$ 0.000 |
| Querc 3-O-Rut                             | 0.017 $\pm$ 0.001 | Tr                | Tr                | Tr                | Tr                |
| Querc 3-O-GlucSD                          | 0.114 $\pm$ 0.002 | 0.005 $\pm$ 0.000 | 0.004 $\pm$ 0.000 | 0.003 $\pm$ 0.000 | 0.003 $\pm$ 0.000 |
| Querc 3-O-Rha                             | 0.978 $\pm$ 0.003 | 0.067 $\pm$ 0.006 | 0.043 $\pm$ 0.000 | 0.044 $\pm$ 0.001 | 0.036 $\pm$ 0.001 |
| Querc-Ace-GlucSD <sup>b</sup>             | 0.018 $\pm$ 0.002 | Tr                | Tr                | Tr                | Tr                |
| Querc 3-O-GlucSD-7-O-Rha <sup>b</sup>     | 0.087 $\pm$ 0.003 | 0.018 $\pm$ 0.000 | 0.012 $\pm$ 0.001 | 0.013 $\pm$ 0.000 | 0.009 $\pm$ 0.000 |
| Querc 3-O-Samb-7-O-Rha <sup>b</sup>       | 0.010 $\pm$ 0.001 | Tr                | Tr                | Tr                | Tr                |
| IsorhTN                                   | Tr                | Tr                | Tr                | Tr                | Tr                |
| IsorhTN-3-O-GlucSD                        | 0.016 $\pm$ 0.001 | Tr                | Tr                | Tr                | Tr                |
| Kmpf-MaO-GlucSD <sup>b</sup>              | 0.017 $\pm$ 0.002 | Tr                | Tr                | Tr                | Tr                |

**Table S3.** (continued)

| Compound <sup>a</sup>                                                  | Raw           | Grilled       | Canned        | Microwaved    | Fried         |
|------------------------------------------------------------------------|---------------|---------------|---------------|---------------|---------------|
| <b>Flavones</b>                                                        |               |               |               |               |               |
| Lut                                                                    | 0.003 ± 0.000 | 0.005 ± 0.000 | 0.003 ± 0.000 | 0.003 ± 0.000 | 0.003 ± 0.000 |
| Lut 7- <i>O</i> -GlucSD                                                | 0.006 ± 0.000 | Tr            | Tr            | Tr            | Tr            |
| Lut 8- <i>C</i> -GlucSD                                                | 0.081 ± 0.002 | 0.017 ± 0.001 | 0.022 ± 0.001 | 0.023 ± 0.001 | 0.019 ± 0.001 |
| Lut -6- <i>C</i> -GlucSD <sup>b</sup>                                  | 0.063 ± 0.002 | 0.010 ± 0.001 | 0.018 ± 0.000 | 0.018 ± 0.001 | 0.014 ± 0.001 |
| Lut -6- <i>C</i> -Hex-8- <i>C</i> -Pent <sup>b</sup>                   | 0.007 ± 0.001 | 0.005 ± 0.001 | 0.004 ± 0.000 | 0.004 ± 0.000 | 0.004 ± 0.000 |
| Lut -6- <i>C</i> -Pent-8- <i>C</i> -Hex <sup>b</sup>                   | Tr            | Tr            | Tr            | Tr            | Tr            |
| Lut -6,8- <i>C</i> -diGlucSD <sup>b</sup>                              | 0.008 ± 0.001 | 0.005 ± 0.000 | 0.005 ± 0.000 | 0.006 ± 0.000 | 0.004 ± 0.000 |
| Lut -7- <i>O</i> -(2- <i>O</i> -Ap)GlucSD <sup>b</sup>                 | 0.062 ± 0.005 | 0.016 ± 0.001 | 0.034 ± 0.001 | 0.037 ± 0.002 | 0.032 ± 0.003 |
| Lut 7- <i>O</i> -(2- <i>O</i> -Ap-Ac)GlucSD <sup>b</sup>               | 0.016 ± 0.001 | Tr            | Tr            | Tr            | Tr            |
| Lut 7- <i>O</i> -(2- <i>O</i> -Ap-6- <i>O</i> -MaO)GlucSD <sup>b</sup> | 0.852 ± 0.002 | 0.076 ± 0.006 | 0.042 ± 0.003 | 0.052 ± 0.001 | 0.036 ± 0.002 |
| ChryOL 6- <i>C</i> -GlucSD <sup>b</sup>                                | Tr            | Tr            | Tr            | Tr            | Tr            |
| Apig-8- <i>C</i> -GlucSD                                               | Tr            | Tr            | Tr            | Tr            | Tr            |
| Apig 6,8- <i>C</i> -diGlucSD                                           | 0.046 ± 0.001 | 0.025 ± 0.001 | 0.018 ± 0.000 | 0.020 ± 0.000 | 0.015 ± 0.000 |
| Apig -Pent-Hex <sup>b</sup>                                            | 0.016 ± 0.001 | 0.008 ± 0.000 | 0.006 ± 0.000 | 0.007 ± 0.000 | 0.006 ± 0.000 |
| Apig 7- <i>O</i> -(2- <i>O</i> -Ap)GlucSD <sup>b</sup>                 | 0.059 ± 0.005 | 0.050 ± 0.003 | 0.070 ± 0.006 | 0.083 ± 0.001 | 0.072 ± 0.000 |
| <b>Flavanones</b>                                                      |               |               |               |               |               |
| NarGE <sup>b</sup>                                                     | 0.068 ± 0.001 | Tr            | Tr            | Tr            | Tr            |
| NarGE-7- <i>O</i> -GlucSD                                              | 0.030 ± 0.001 | Tr            | Tr            | Tr            | Tr            |

nd= not detected; Tr=traces. <sup>a</sup> Full compound names are shown in Table S2. <sup>b</sup> Tentatively identified and semiquantified compounds. <sup>c</sup> Compounds derived from simulated gastrointestinal digestion.

**Table S4.** Minor (poly)phenols and derivatives from 48h of colonic fermentation of raw and thermally treated Piquillo pepper ( $\mu\text{mol}$  of (poly)phenolic compound per g of pepper (dry matter) (mean  $\pm$  standard deviation, n=3).

| Compound <sup>a</sup>                            | Raw               | Grilled           | Canned            | Microwaved        | Fried             |
|--------------------------------------------------|-------------------|-------------------|-------------------|-------------------|-------------------|
| <b>NON-FLAVONOIDS</b>                            |                   |                   |                   |                   |                   |
| <b>Cinnamic acids</b>                            |                   |                   |                   |                   |                   |
| <b>4'-OH-CA</b>                                  |                   |                   |                   |                   |                   |
| T 0h <sup>d</sup>                                | 0.015 $\pm$ 0.000 | 0.010 $\pm$ 0.000 | 0.006 $\pm$ 0.000 | 0.007 $\pm$ 0.000 | 0.006 $\pm$ 0.000 |
| T 2h                                             | 0.078 $\pm$ 0.004 | 0.006 $\pm$ 0.001 | 0.030 $\pm$ 0.003 | 0.026 $\pm$ 0.001 | 0.016 $\pm$ 0.002 |
| T 6h                                             | Tr                | Tr                | Tr                | Tr                | Tr                |
| T 24h                                            | nd                | nd                | nd                | nd                | 0.029 $\pm$ 0.001 |
| T 48h                                            | nd                | nd                | nd                | nd                | Tr                |
| <b>4'-OH-CA-3'-O-GlucSD<sup>b</sup></b>          |                   |                   |                   |                   |                   |
| T 0h <sup>d</sup>                                | 0.053 $\pm$ 0.003 | 0.023 $\pm$ 0.002 | 0.020 $\pm$ 0.001 | 0.022 $\pm$ 0.000 | 0.016 $\pm$ 0.001 |
| T 2h                                             | 0.041 $\pm$ 0.003 | 0.006 $\pm$ 0.000 | 0.021 $\pm$ 0.001 | 0.010 $\pm$ 0.000 | 0.025 $\pm$ 0.000 |
| T 6h                                             | 0.008 $\pm$ 0.000 | Tr                | Tr                | tr                | Tr                |
| T 24h                                            | nd                | nd                | nd                | nd                | nd                |
| T 48h                                            | nd                | nd                | nd                | nd                | nd                |
| <b>3'-MetOH-CA- 4'-O-GlucSD<sup>b</sup></b>      |                   |                   |                   |                   |                   |
| T 0h <sup>d</sup>                                | 0.074 $\pm$ 0.002 | 0.116 $\pm$ 0.001 | 0.076 $\pm$ 0.007 | 0.068 $\pm$ 0.004 | 0.036 $\pm$ 0.003 |
| T 2h                                             | Tr                | Tr                | Tr                | Tr                | Tr                |
| T 6h                                             | nd                | nd                | nd                | nd                | nd                |
| T 24h                                            | nd                | nd                | nd                | nd                | nd                |
| T 48h                                            | nd                | nd                | nd                | nd                | Nd                |
| <b>4'-OH-3',5'-diMetOH-CA</b>                    |                   |                   |                   |                   |                   |
| T 0h <sup>d</sup>                                | 0.031 $\pm$ 0.002 | 0.009 $\pm$ 0.000 | 0.011 $\pm$ 0.000 | 0.011 $\pm$ 0.000 | 0.009 $\pm$ 0.000 |
| T 2h                                             | 0.103 $\pm$ 0.002 | 0.013 $\pm$ 0.001 | 0.039 $\pm$ 0.000 | 0.023 $\pm$ 0.001 | 0.023 $\pm$ 0.002 |
| T 6h                                             | 0.015 $\pm$ 0.000 | 0.011 $\pm$ 0.000 | 0.019 $\pm$ 0.002 | 0.023 $\pm$ 0.003 | 0.012 $\pm$ 0.001 |
| T 24h                                            | 0.004 $\pm$ 0.000 | 0.002 $\pm$ 0.000 | 0.012 $\pm$ 0.001 | 0.011 $\pm$ 0.001 | 0.008 $\pm$ 0.000 |
| T 48h                                            | 0.010 $\pm$ 0.001 | 0.005 $\pm$ 0.000 | 0.009 $\pm$ 0.001 | 0.014 $\pm$ 0.001 | 0.008 $\pm$ 0.000 |
| <b>3',5'-diMetOH-CA- 4'-O-GlucSD<sup>b</sup></b> |                   |                   |                   |                   |                   |
| T 0h <sup>d</sup>                                | 0.026 $\pm$ 0.002 | 0.016 $\pm$ 0.000 | 0.012 $\pm$ 0.000 | 0.013 $\pm$ 0.000 | 0.012 $\pm$ 0.000 |
| T 2h                                             | 0.008 $\pm$ 0.000 | Tr                | nd                | nd                | Tr                |
| T 6h                                             | nd                | nd                | nd                | nd                | nd                |
| T 24h                                            | nd                | nd                | nd                | nd                | nd                |
| T 48h                                            | nd                | nd                | nd                | nd                | nd                |
| <b>Other phenolics</b>                           |                   |                   |                   |                   |                   |
| <b>2-(3'-OH-Ph)etOH</b>                          |                   |                   |                   |                   |                   |
| T 0h <sup>d</sup>                                | Tr                | Tr                | Tr                | Tr                | 0.006 $\pm$ 0.000 |
| T 2h                                             | 0.005 $\pm$ 0.001 | Tr                | Tr                | 0.002 $\pm$ 0.000 | Tr                |
| T 6h                                             | 0.012 $\pm$ 0.002 | 0.025 $\pm$ 0.002 | 0.014 $\pm$ 0.001 | 0.030 $\pm$ 0.004 | 0.023 $\pm$ 0.002 |
| T 24h                                            | 0.047 $\pm$ 0.003 | 0.059 $\pm$ 0.002 | 0.020 $\pm$ 0.003 | 0.048 $\pm$ 0.004 | 0.016 $\pm$ 0.004 |
| T 48h                                            | 0.049 $\pm$ 0.002 | 0.063 $\pm$ 0.005 | 0.065 $\pm$ 0.005 | 0.054 $\pm$ 0.005 | 0.034 $\pm$ 0.002 |
| <b>FLAVONOIDS</b>                                |                   |                   |                   |                   |                   |
| <b>Flavonols</b>                                 |                   |                   |                   |                   |                   |
| <b>Querc 3-O-Rut</b>                             |                   |                   |                   |                   |                   |
| T 0h <sup>d</sup>                                | 0.017 $\pm$ 0.001 | Tr                | Tr                | Tr                | Tr                |
| T 2h                                             | 0.017 $\pm$ 0.001 | nd                | nd                | nd                | nd                |
| T 6h                                             | Tr                | nd                | nd                | nd                | nd                |
| T 24h                                            | nd                | nd                | nd                | nd                | nd                |
| T 48h                                            | nd                | nd                | nd                | nd                | nd                |
| <b>Querc 3-O-GlucSD</b>                          |                   |                   |                   |                   |                   |
| T 0h <sup>d</sup>                                | 0.114 $\pm$ 0.002 | 0.005 $\pm$ 0.000 | 0.004 $\pm$ 0.000 | 0.003 $\pm$ 0.000 | 0.003 $\pm$ 0.000 |
| T 2h                                             | 0.142 $\pm$ 0.009 | nd                | nd                | nd                | nd                |
| T 6h                                             | Tr                | nd                | nd                | nd                | nd                |
| T 24h                                            | nd                | nd                | nd                | nd                | nd                |
| T 48h                                            | nd                | nd                | nd                | nd                | nd                |
| <b>Querc 3- O-GlucSD-7-O-Rha<sup>b</sup></b>     |                   |                   |                   |                   |                   |
| T 0h <sup>d</sup>                                | 0.087 $\pm$ 0.003 | 0.018 $\pm$ 0.000 | 0.012 $\pm$ 0.001 | 0.013 $\pm$ 0.000 | 0.009 $\pm$ 0.000 |
| T 2h                                             | 0.155 $\pm$ 0.011 | 0.021 $\pm$ 0.002 | 0.013 $\pm$ 0.001 | 0.017 $\pm$ 0.001 | 0.012 $\pm$ 0.001 |
| T 6h                                             | nd                | nd                | nd                | nd                | nd                |
| T 24h                                            | nd                | nd                | nd                | nd                | nd                |
| T 48h                                            | nd                | nd                | nd                | nd                | nd                |
| <b>Querc 3- O-Samb-7-O-Rha<sup>b</sup></b>       |                   |                   |                   |                   |                   |
| T 0h <sup>d</sup>                                | 0.010 $\pm$ 0.001 | nd                | nd                | nd                | nd                |
| T 2h                                             | 0.021 $\pm$ 0.001 | nd                | nd                | nd                | nd                |
| T 6h                                             | nd                | nd                | nd                | nd                | nd                |
| T 24h                                            | nd                | nd                | nd                | nd                | nd                |
| T 48h                                            | nd                | nd                | nd                | nd                | nd                |

**Table S4 (continued)**

| <b>Compound<sup>a</sup></b>              | <b>Raw</b>    | <b>Grilled</b> | <b>Canned</b> | <b>Microwaved</b> | <b>Fried</b>  |
|------------------------------------------|---------------|----------------|---------------|-------------------|---------------|
| <b>Flavonols (continued)</b>             |               |                |               |                   |               |
| <b>IsorhTN</b>                           |               |                |               |                   |               |
| T 0h <sup>d</sup>                        | Tr            | Tr             | Tr            | Tr                | Tr            |
| T 2h                                     | nd            | nd             | nd            | nd                | nd            |
| T 6h                                     | nd            | nd             | 0.004 ± 0.001 | Tr                | nd            |
| T 24h                                    | 0.014 ± 0.001 | 0.018 ± 0.006  | Tr            | 0.007 ± 0.000     | nd            |
| T 48h                                    | 0.003 ± 0.000 | Tr             | 0.004 ± 0.000 | Tr                | nd            |
| <b>IsorhTN-3-O-glucoside</b>             |               |                |               |                   |               |
| T 0h <sup>d</sup>                        | 0.016 ± 0.001 | Tr             | Tr            | Tr                | Tr            |
| T 2h                                     | 0.066 ± 0.001 | nd             | nd            | nd                | nd            |
| T 6h                                     | Tr            | nd             | nd            | nd                | nd            |
| T 24h                                    | nd            | nd             | nd            | nd                | nd            |
| T 48h                                    | nd            | nd             | nd            | nd                | nd            |
| <b>Kmpf<sup>c</sup></b>                  |               |                |               |                   |               |
| T 0h <sup>d</sup>                        | nd            | nd             | nd            | nd                | nd            |
| T 2h                                     | nd            | Tr             | nd            | Tr                | Tr            |
| T 6h                                     | 0.013 ± 0.001 | 0.015 ± 0.001  | 0.014 ± 0.001 | 0.019 ± 0.002     | 0.006 ± 0.001 |
| T 24h                                    | 0.017 ± 0.000 | 0.016 ± 0.001  | 0.009 ± 0.000 | 0.011 ± 0.000     | 0.003 ± 0.000 |
| T 48h                                    | 0.017 ± 0.001 | 0.017 ± 0.001  | 0.018 ± 0.001 | 0.008 ± 0.001     | 0.004 ± 0.000 |
| <b>Kmpf-7-O-GlucSD<sup>c</sup></b>       |               |                |               |                   |               |
| T 0h <sup>d</sup>                        | nd            | nd             | nd            | nd                | nd            |
| T 2h                                     | 0.005 ± 0.000 | 0.010 ± 0.001  | 0.007 ± 0.000 | 0.011 ± 0.000     | 0.007 ± 0.001 |
| T 6h                                     | 0.008 ± 0.001 | 0.010 ± 0.001  | 0.012 ± 0.001 | 0.012 ± 0.001     | 0.009 ± 0.000 |
| T 24h                                    | 0.008 ± 0.000 | 0.010 ± 0.001  | 0.010 ± 0.001 | 0.009 ± 0.001     | 0.006 ± 0.001 |
| T 48h                                    | 0.007 ± 0.001 | 0.011 ± 0.001  | 0.012 ± 0.001 | 0.011 ± 0.001     | 0.010 ± 0.001 |
| <b>Flavones</b>                          |               |                |               |                   |               |
| <b>Lut 7-O-GlucSD</b>                    |               |                |               |                   |               |
| T 0h <sup>d</sup>                        | 0.006 ± 0.000 | Tr             | Tr            | Tr                | Tr            |
| T 2h                                     | 0.177 ± 0.002 | nd             | nd            | nd                | nd            |
| T 6h                                     | 0.020 ± 0.002 | nd             | nd            | nd                | nd            |
| T 24h                                    | nd            | nd             | nd            | nd                | nd            |
| T 48h                                    | nd            | nd             | nd            | nd                | nd            |
| <b>Lut 8-C-GlucSD</b>                    |               |                |               |                   |               |
| T 0h <sup>d</sup>                        | 0.081 ± 0.002 | 0.017 ± 0.001  | 0.022 ± 0.001 | 0.023 ± 0.001     | 0.019 ± 0.001 |
| T 2h                                     | 0.198 ± 0.005 | 0.005 ± 0.000  | 0.019 ± 0.001 | 0.014 ± 0.001     | 0.012 ± 0.001 |
| T 6h                                     | 0.044 ± 0.006 | 0.005 ± 0.000  | 0.011 ± 0.001 | 0.010 ± 0.001     | 0.023 ± 0.000 |
| T 24h                                    | Tr            | Tr             | Tr            | Tr                | 0.009 ± 0.001 |
| T 48h                                    | nd            | nd             | nd            | nd                | nd            |
| <b>Lut 6-C-GlucSD<sup>b</sup></b>        |               |                |               |                   |               |
| T 0h <sup>d</sup>                        | 0.063 ± 0.002 | 0.010 ± 0.001  | 0.018 ± 0.000 | 0.018 ± 0.001     | 0.014 ± 0.001 |
| T 2h                                     | 0.102 ± 0.005 | 0.009 ± 0.001  | 0.016 ± 0.001 | 0.016 ± 0.002     | 0.014 ± 0.001 |
| T 6h                                     | 0.022 ± 0.001 | 0.007 ± 0.001  | 0.007 ± 0.000 | 0.010 ± 0.001     | 0.009 ± 0.001 |
| T 24h                                    | Tr            | Tr             | nd            | Tr                | Tr            |
| T 48h                                    | nd            | nd             | nd            | nd                | nd            |
| <b>Lut -6-C-Hex-8-C-Pent<sup>b</sup></b> |               |                |               |                   |               |
| T 0h <sup>d</sup>                        | 0.007 ± 0.001 | 0.005 ± 0.001  | 0.004 ± 0.000 | 0.004 ± 0.000     | 0.004 ± 0.000 |
| T 2h                                     | 0.017 ± 0.001 | Tr             | Tr            | Tr                | Tr            |
| T 6h                                     | Tr            | nd             | nd            | nd                | nd            |
| T 24h                                    | nd            | nd             | nd            | nd                | nd            |
| T 48h                                    | nd            | nd             | nd            | nd                | nd            |
| <b>Lut -6-C-Pent-8-C-Hex<sup>b</sup></b> |               |                |               |                   |               |
| T 0h <sup>d</sup>                        | Tr            | Tr             | Tr            | Tr                | Tr            |
| T 2h                                     | 0.011 ± 0.001 | nd             | nd            | nd                | nd            |
| T 6h                                     | Tr            | nd             | nd            | nd                | nd            |
| T 24h                                    | nd            | nd             | nd            | nd                | nd            |
| T 48h                                    | nd            | nd             | nd            | nd                | nd            |
| <b>Lut -6,8-C-diGlucSD<sup>b</sup></b>   |               |                |               |                   |               |
| T 0h <sup>d</sup>                        | 0.008 ± 0.001 | 0.005 ± 0.000  | 0.005 ± 0.000 | 0.006 ± 0.000     | 0.004 ± 0.000 |
| T 2h                                     | 0.020 ± 0.001 | 0.004 ± 0.000  | 0.005 ± 0.000 | 0.005 ± 0.000     | 0.003 ± 0.000 |
| T 6h                                     | Tr            | Tr             | Tr            | Tr                | Tr            |
| T 24h                                    | nd            | nd             | nd            | nd                | nd            |
| T 48h                                    | nd            | nd             | nd            | nd                | nd            |
| <b>ChryOL 6-C-GlucSD<sup>b</sup></b>     |               |                |               |                   |               |
| T 0h <sup>d</sup>                        | Tr            | Tr             | Tr            | Tr                | Tr            |
| T 2h                                     | 0.013 ± 0.001 | nd             | nd            | nd                | nd            |
| T 6h                                     | Tr            | nd             | nd            | nd                | nd            |
| T 24h                                    | nd            | nd             | nd            | nd                | nd            |
| T 48h                                    | nd            | nd             | nd            | nd                | nd            |



**Table S4 (continued)**

| Compound <sup>a</sup>                      | Raw           | Grilled       | Canned        | Microwaved    | Fried         |
|--------------------------------------------|---------------|---------------|---------------|---------------|---------------|
| <b>Flavones (continued)</b>                |               |               |               |               |               |
| <b>Apig-8-C-GlucSD</b>                     |               |               |               |               |               |
| T 0h <sup>d</sup>                          | Tr            | Tr            | Tr            | Tr            | Tr            |
| T 2h                                       | 0.020 ± 0.002 | nd            | nd            | nd            | nd            |
| T 6h                                       | nd            | nd            | nd            | nd            | nd            |
| T 24h                                      | nd            | nd            | nd            | nd            | nd            |
| T 48h                                      | nd            | nd            | nd            | nd            | nd            |
| <b>Apig-6,8-C-diGlucSD</b>                 |               |               |               |               |               |
| T 0h <sup>d</sup>                          | 0.046 ± 0.001 | 0.025 ± 0.001 | 0.018 ± 0.000 | 0.020 ± 0.000 | 0.015 ± 0.000 |
| T 2h                                       | 0.103 ± 0.003 | 0.008 ± 0.000 | 0.015 ± 0.000 | 0.013 ± 0.001 | 0.008 ± 0.001 |
| T 6h                                       | 0.007 ± 0.001 | Tr            | Tr            | Tr            | nd            |
| T 24h                                      | nd            | nd            | nd            | nd            | nd            |
| T 48h                                      | nd            | nd            | nd            | nd            | nd            |
| <b>Apig -Pent-Hex<sup>b</sup></b>          |               |               |               |               |               |
| T 0h <sup>d</sup>                          | 0.016 ± 0.001 | 0.008 ± 0.000 | 0.006 ± 0.000 | 0.007 ± 0.000 | 0.006 ± 0.000 |
| T 2h                                       | 0.047 ± 0.001 | 0.009 ± 0.001 | 0.008 ± 0.001 | 0.009 ± 0.001 | 0.009 ± 0.000 |
| T 6h                                       | 0.008 ± 0.001 | 0.005 ± 0.000 | 0.005 ± 0.000 | 0.004 ± 0.000 | 0.005 ± 0.001 |
| T 24h                                      | nd            | nd            | nd            | nd            | nd            |
| T 48h                                      | nd            | nd            | nd            | nd            | nd            |
| <b>Apig 7-O-(2-O-Ap)GlucSD<sup>b</sup></b> |               |               |               |               |               |
| T 0h <sup>d</sup>                          | 0.059 ± 0.005 | 0.050 ± 0.003 | 0.070 ± 0.006 | 0.083 ± 0.001 | 0.072 ± 0.000 |
| T 2h                                       | 0.062 ± 0.002 | 0.036 ± 0.004 | 0.052 ± 0.004 | 0.046 ± 0.002 | 0.028 ± 0.002 |
| T 6h                                       | 0.026 ± 0.002 | 0.028 ± 0.002 | 0.046 ± 0.004 | 0.040 ± 0.001 | 0.026 ± 0.002 |
| T 24h                                      | Tr            | Tr            | Tr            | Tr            | Tr            |
| T 48h                                      | nd            | nd            | nd            | nd            | nd            |
| <b>Flavanones</b>                          |               |               |               |               |               |
| <b>NarGE-7-O-GlucSD</b>                    |               |               |               |               |               |
| T 0h <sup>d</sup>                          | 0.030 ± 0.001 | Tr            | Tr            | Tr            | Tr            |
| T 2h                                       | 0.056 ± 0.007 | nd            | nd            | nd            | nd            |
| T 6h                                       | Tr            | nd            | nd            | nd            | nd            |
| T 24h                                      | nd            | nd            | nd            | nd            | nd            |
| T 48h                                      | nd            | nd            | nd            | nd            | nd            |

nd= not detected; Tr=traces. <sup>a</sup> Full compound names are shown in Table S2. <sup>b</sup> Tentatively identified and semiquantified compounds. <sup>c</sup> Compounds derived from colonic fermentation. <sup>d</sup> T0h was assumed to correspond to (poly)phenolic content of pepper samples after *in vitro* gastrointestinal digestion.

**Table S5.** Phenolic compounds derived from other sources identified and quantified during the 48h colonic fermentation of raw and thermally treated Piquillo pepper. Results are expressed as  $\mu\text{mol}$  of (poly)phenolic compound per g of pepper (dry matter) (mean  $\pm$  standard deviation, n=3).

| Compound <sup>a</sup>        | Raw                | Grilled            | Canned             | Microwaved         | Fried               |
|------------------------------|--------------------|--------------------|--------------------|--------------------|---------------------|
| <b>3-PrA</b>                 |                    |                    |                    |                    |                     |
| T 0h <sup>c</sup>            | 0.693 $\pm$ 0.014  | 0.729 $\pm$ 0.010  | 0.820 $\pm$ 0.024  | 0.871 $\pm$ 0.010  | 0.649 $\pm$ 0.009   |
| T 2h                         | 0.252 $\pm$ 0.020  | nd                 | nd                 | nd                 | nd                  |
| T 6h                         | Tr                 | nd                 | nd                 | nd                 | nd                  |
| T 24h                        | 12.544 $\pm$ 1.095 | 10.110 $\pm$ 0.401 | Tr                 | Tr                 | 29.613 $\pm$ 2.131  |
| T 48h                        | nd                 | nd                 | nd                 | nd                 | nd                  |
| <b>PhA</b>                   |                    |                    |                    |                    |                     |
| T 0h <sup>c</sup>            | 1.078 $\pm$ 0.049  | 1.053 $\pm$ 0.065  | 1.187 $\pm$ 0.029  | 1.298 $\pm$ 0.025  | 0.757 $\pm$ 0.007   |
| T 2h                         | 0.926 $\pm$ 0.064  | nd                 | nd                 | nd                 | nd                  |
| T 6h                         | nd                 | nd                 | nd                 | nd                 | nd                  |
| T 24h                        | 40.557 $\pm$ 1.656 | 17.322 $\pm$ 1.520 | 34.604 $\pm$ 2.307 | 67.461 $\pm$ 5.542 | 127.327 $\pm$ 8.665 |
| T 48h                        | Tr                 | Tr                 | Tr                 | Tr                 | 5.964 $\pm$ 0.511   |
| <b>4'-OH-PhA<sup>b</sup></b> |                    |                    |                    |                    |                     |
| T 0h <sup>c</sup>            | nd                 | nd                 | nd                 | nd                 | nd                  |
| T 2h                         | Tr                 | Tr                 | 0.864 $\pm$ 0.059  | 0.504 $\pm$ 0.016  | 0.243 $\pm$ 0.016   |
| T 6h                         | nd                 | nd                 | 7.559 $\pm$ 0.806  | 3.411 $\pm$ 0.127  | 2.303 $\pm$ 0.123   |
| T 24h                        | 33.171 $\pm$ 2.416 | 17.874 $\pm$ 0.462 | 51.987 $\pm$ 2.614 | 55.923 $\pm$ 0.073 | 57.236 $\pm$ 2.687  |
| T 48h                        | 0.642 $\pm$ 0.072  | 0.801 $\pm$ 0.035  | 28.229 $\pm$ 2.050 | 46.817 $\pm$ 3.292 | 42.275 $\pm$ 2.386  |

nd= not detected; Tr= traces.<sup>a</sup> Full compound names are shown in Table S2. <sup>b</sup> Compounds derived from colonic fermentation. <sup>c</sup> T0h was assumed to correspond to (poly)phenolic content of pepper samples after *in vitro* gastrointestinal digestion.
